# Supplementary material for: Complete Mitochondrial Genome for Lucilia cuprina dorsalis (Diptera: Calliphoridae) from the Northern Territory, Australia
Source: MDPI journal article supplement (doi:10.3390/genes15040506), 2024-04-18
Supplement: s1 [file s1]

**Table S2**

Mitochondrial (mt) genome structure of *Lucilia cuprina dorsalis* from the Northern Territory in Australia.

| Genes             | Location    | <i>L. c. dorsalis</i><br>(Northern Territory, Australia) |             |             |            |
|-------------------|-------------|----------------------------------------------------------|-------------|-------------|------------|
|                   |             | Transcription direction                                  | Length (bp) | Start codon | Stop codon |
| <i>rrnS</i>       | 14612-14873 | reverse                                                  | 787         |             |            |
| <i>trnV(tac)</i>  | 14542-14613 | reverse                                                  | 72          |             |            |
| <i>rrnL</i>       | 13193-14485 | reverse                                                  | 1293        |             |            |
| <i>trnL1(tag)</i> | 13149-13213 | reverse                                                  | 65          |             |            |
| <i>nad1</i>       | 12200-13218 | reverse                                                  | 939         | ATA         | TAA        |
| <i>trnS2(tga)</i> | 12116-12183 | forward                                                  | 68          |             |            |
| <i>cob</i>        | 10981-12117 | forward                                                  | 1137        | ATG         | TAA        |
| <i>nad6</i>       | 10487-10981 | forward                                                  | 495         | ATT         | TAA        |
| <i>trnP(tgg)</i>  | 10389-10454 | reverse                                                  | 66          |             |            |
| <i>trnT(tgt)</i>  | 10324-10388 | forward                                                  | 65          |             |            |
| <i>nad4l</i>      | 10025-10321 | reverse                                                  | 297         | ATG         | TAA        |
| <i>nad4</i>       | 8631-9965   | reverse                                                  | 1335        | ATG         | TAA        |
| <i>trnH(gtg)</i>  | 8628-8692   | forward                                                  | 65          |             |            |
| <i>nad5</i>       | 6890-8603   | reverse                                                  | 1714        | ATT         | Incomplete |
| <i>trnF(gaa)</i>  | 6826-6892   | reverse                                                  | 67          |             |            |
| <i>trnE(ttc)</i>  | 6740-6807   | forward                                                  | 68          |             |            |
| <i>trnS1(gct)</i> | 6670-6737   | forward                                                  | 68          |             |            |
| <i>trnN(gtt)</i>  | 6604-6669   | forward                                                  | 66          |             |            |
| <i>trnR(tcg)</i>  | 6541-6603   | forward                                                  | 63          |             |            |
| <i>trnA(tgc)</i>  | 6477-6541   | forward                                                  | 65          |             |            |

|                   |           |         |      |     |            |
|-------------------|-----------|---------|------|-----|------------|
| <i>nad3</i>       | 6121-6474 | forward | 354  | ATT | TAA        |
| <i>trnG(tcc)</i>  | 6056-6120 | forward | 65   |     |            |
| <i>cox3</i>       | 5260-6048 | forward | 789  | ATG | TAA        |
| <i>atp6</i>       | 4583-5260 | forward | 678  | ATG | TAA        |
| <i>atp8</i>       | 4425-4589 | forward | 165  | ATT | TAA        |
| <i>trnD(gtc)</i>  | 4358-4424 | forward | 67   |     |            |
| <i>trnK(ctt)</i>  | 4288-4358 | forward | 71   |     |            |
| <i>cox2</i>       | 3600-4284 | forward | 685  | ATG | Incomplete |
| <i>trnL2(taa)</i> | 3528-3593 | forward | 66   |     |            |
| <i>cox1</i>       | 1994-3532 | forward | 1539 | TCG | TAA        |
| <i>trnY(gta)</i>  | 1929-1995 | reverse | 67   |     |            |
| <i>trnC(gca)</i>  | 1863-1926 | reverse | 64   |     |            |
| <i>trnW(tca)</i>  | 1803-1870 | forward | 68   |     |            |
| <i>nad2</i>       | 808-1803  | forward | 996  | ATT | TAA        |
| <i>trnM(cat)</i>  | 718-786   | forward | 69   |     |            |
| <i>trnQ(ttg)</i>  | 644-712   | reverse | 69   |     |            |
| <i>trnI(gat)</i>  | 581-646   | forward | 66   |     |            |
