# Supplementary material for: Complete Mitochondrial Genome for Lucilia cuprina dorsalis (Diptera: Calliphoridae) from the Northern Territory, Australia
Source: MDPI journal article supplement (doi:10.3390/genes15040506), 2024-04-18
Supplement: s1 [file s1]

**Table S1**

Details on Dipteran mitochondrial (mt) genomic sequences and collection locations used for the phylogenetic analysis in the present study.

| Species                                  | Family        | Accession number | Length (bp) | Place of origin                                 | Reference                           |
|------------------------------------------|---------------|------------------|-------------|-------------------------------------------------|-------------------------------------|
| <i>Calliphora chinghaiensis</i>          | Calliphoridae | NC_029215        | 15269       | China                                           | (Chen et al., 2016)                 |
| <i>Calliphora nigribarbis</i>            | Calliphoridae | MK893470         | 16279       | South Korea                                     | (Karagozlu et al., 2019)            |
| <i>Calliphora vicina</i>                 | Calliphoridae | NC_019639        | 16112       | France (Voucher-DI242)                          | (Nelson et al., 2012)               |
| <i>Calliphora vomitoria</i>              | Calliphoridae | NC_028411        | 16134       | China                                           | (Ren et al., 2016)                  |
| <i>Chrysomya megacephala</i>             | Calliphoridae | AJ426041         | 15831       | Calicut, Kerala State, India                    | (Stevens et al., 2008)              |
| <i>Chrysomya pinguis</i>                 | Calliphoridae | NC_025338        | 15838       | China                                           | Yan et al., 2016                    |
| <i>Chrysomya putoria</i>                 | Calliphoridae | AF352790         | 15837       | Brazil                                          | (Junqueira et al., 2004)            |
| <i>Chrysomya rufifacies</i> strain DI215 | Calliphoridae | JX913740         | 15412       | El Questro Resort, WA, Australia (Voucher-D215) | (Nelson et al., 2012)               |
| <i>Chrysomya villeneuvei</i>             | Calliphoridae | MW592365         | 15623       | China                                           | (Guo and Zhang) (unpublished)       |
| <i>Cochliomyia hominivorax</i>           | Calliphoridae | AF260826         | 16022       | Brazil                                          | (Lessinger and Azeredo-Espin, 2000) |
| <i>Dermatobia hominis</i>                | Oestridae     | NC_006378        | 16360       | Brazil                                          | (Azeredo-Espin et al., 2004)        |
| <i>Exorista japonica</i>                 | Tachinidae    | NC_044409        | 17663       | South Korea                                     | (Seo et al., 2019)                  |
| <i>Exorista sorbillans</i>               | Tachinidae    | NC_014704        | 14960       | China                                           | (Shao et al., 2012)                 |
| <i>Haematobia irritans irritans</i>      | Muscidae      | DQ029097         | 16078       | Brazil                                          | (Oliveira et al., 2008)             |
| <i>Hemipyrellia ligurriens</i>           | Calliphoridae | NC_019638        | 15938       | University of Queensland campus, St Lucia,      | (Nelson et al., 2012)               |

|                                                                  |               |           |       |                                                                       |                                   |
|------------------------------------------------------------------|---------------|-----------|-------|-----------------------------------------------------------------------|-----------------------------------|
|                                                                  |               |           |       | Brisbane, Qld,<br>Australia                                           |                                   |
| <i>Hypoderma lineatum</i>                                        | Oestridae     | NC_013932 | 16354 | Italy                                                                 | (Weigl et al., 2010)              |
| <i>Hypoderma sinense</i>                                         | Oestridae     | NC_071819 | 16296 | China                                                                 | (Tang et al.)<br>(unpublished)    |
| <i>Lucilia caesar</i><br>isolate C2                              | Calliphoridae | NC_028057 | 15954 | UK                                                                    | (Schoofs et al.)<br>(unpublished) |
| <i>Lucilia caesar</i><br>isolate C3                              | Calliphoridae | KM657112  | 15957 | UK                                                                    | (Schoofs et al.)<br>(unpublished) |
| <i>Lucilia coeruleiviridis</i>                                   | Calliphoridae | NC_029486 | 14989 | USA                                                                   | (Junqueira et al., 2016)          |
| <i>Lucilia cuprina</i>                                           | Calliphoridae | KT272779  | 14943 | Brazil                                                                | (Junqueira et al., 2016)          |
| <i>Lucilia cuprina cuprina</i> QLD,<br>Australia                 | Calliphoridae | MW255538  | 15952 | QLD,<br>Australia                                                     | (Kapoor et al., 2023)             |
| <i>Lucilia cuprina dorsalis</i> NSW,<br>Australia                | Calliphoridae | MW255537  | 15941 | NSW,<br>Australia                                                     | (Kapoor et al., 2023)             |
| <i>Lucilia cuprina dorsalis</i> VIC,<br>Australia                | Calliphoridae | MW255536  | 15941 | VIC, Australia                                                        | (Kapoor et al., 2023)             |
| <i>Lucilia cuprina dorsalis</i> WA,<br>Australia                 | Calliphoridae | MW255539  | 15944 | WA, Australia                                                         | (Kapoor et al., 2023)             |
| <i>Lucilia cuprina dorsalis</i> NT,<br>Australia                 | Calliphoridae | PP297113  | 15943 | NT, Australia                                                         | Present study                     |
| <i>Lucilia cuprina</i> strain DI190.1<br>Melbourne,<br>Australia | Calliphoridae | JX913744  | 15952 | University of Melbourne colony; (P. Batterham)<br>(Voucher - DI190.1) | (Nelson et al., 2012)             |
| <i>Lucilia cuprina</i> strain DI190.2<br>Melbourne,<br>Australia | Calliphoridae | JX913745  | 15950 | University of Melbourne colony; (P. Batterham)<br>(Voucher - DI190.2) | (Nelson et al., 2012)             |

|                                                               |               |           |       |                                                                    |                                |
|---------------------------------------------------------------|---------------|-----------|-------|--------------------------------------------------------------------|--------------------------------|
| <i>Lucilia cuprina</i> strain DI190.3<br>Melbourne, Australia | Calliphoridae | JX913746  | 15952 | University of Melbourne colony; (P. Batterham) (Voucher - DI190.3) | (Nelson et al., 2012)          |
| <i>Lucilia cuprina</i> strain DI190.4<br>Melbourne, Australia | Calliphoridae | JX913747  | 15943 | University of Melbourne colony; (P. Batterham) (Voucher - DI190.4) | (Nelson et al., 2012)          |
| <i>Lucilia cuprina</i> strain DI190.5<br>Melbourne, Australia | Calliphoridae | JX913748  | 15946 | University of Melbourne colony; (P. Batterham) (Voucher - DI190.5) | (Nelson et al., 2012)          |
| <i>Lucilia cuprina</i> strain DI213.1 QLD, Australia          | Calliphoridae | JX913749  | 15348 | Petrie Terrace, Brisbane, QLD (Voucher-DI213.1)                    | (Nelson et al., 2012)          |
| <i>Lucilia cuprina</i> strain DI213.2 QLD, Australia          | Calliphoridae | JX913750  | 15310 | Petrie Terrace, Brisbane, QLD (Voucher-DI213.2)                    | (Nelson et al., 2012)          |
| <i>Lucilia cuprina</i> strain DI213.3 QLD, Australia          | Calliphoridae | JX913751  | 15289 | Petrie Terrace, Brisbane, QLD (Voucher-DI213.3)                    | (Nelson et al., 2012)          |
| <i>Lucilia cuprina</i> strain DI213.4 QLD, Australia          | Calliphoridae | JX913752  | 15268 | Petrie Terrace, Brisbane, QLD (Voucher-DI213.4)                    | (Nelson et al., 2012)          |
| <i>Lucilia cuprina</i> strain DI213.5 QLD, Australia          | Calliphoridae | JX913753  | 15226 | Petrie Terrace, Brisbane, QLD (Voucher-DI213.5)                    | (Nelson et al., 2012)          |
| <i>Lucilia hainanensis</i>                                    | Calliphoridae | MW592363  | 15319 | China                                                              | (Guo nd Zhang) (unpublished)   |
| <i>Lucilia illustris</i>                                      | Calliphoridae | KT272845  | 14875 | USA                                                                | (Junqueira et al., 2016)       |
| <i>Lucilia illustris</i> isolate 1sp10                        | Calliphoridae | NC_028056 | 15954 | UK                                                                 | (Schoofs et al.) (unpublished) |
| <i>Lucilia illustris</i> isolate 1sp11                        | Calliphoridae | KM657110  | 15956 | UK                                                                 | (Schoofs et al.) (unpublished) |

|                                                     |               |           |       |                                                                                                                      |                              |
|-----------------------------------------------------|---------------|-----------|-------|----------------------------------------------------------------------------------------------------------------------|------------------------------|
|                                                     |               |           |       |                                                                                                                      |                              |
| <i>Lucilia papuensis</i> isolate C44                | Calliphoridae | MH540746  | 15884 | China                                                                                                                | (Ma and Huang) (unpublished) |
| <i>Lucilia papuensis</i> voucher CSU1911193 2       | Calliphoridae | NC_053672 | 15323 | China                                                                                                                | (Guo and Ren) (unpublished)  |
| <i>Lucilia porphyrina</i>                           | Calliphoridae | NC_019637 | 15877 | University of Queensland campus, St Lucia, Brisbane, QLD, Australia (Voucher - DI211)                                | (Nelson et al., 2012)        |
| <i>Lucilia sericata</i>                             | Calliphoridae | KT272854  | 15092 | USA                                                                                                                  | (Junqueira et al., 2016)     |
| <i>Lucilia sericata</i> strain DI220 QLD, Australia | Calliphoridae | JX913755  | 15300 | Queensland Department of Primary Industries and Fisheries Agricultural Research Institute lab strain (Voucher-DI220) | (Nelson et al., 2012)        |
| <i>Lucilia sericata</i> strain DI245 WA, Australia  | Calliphoridae | JX913756  | 15214 | Perth, WA, Australia (Voucher-DI245)                                                                                 | (Nelson et al., 2012)        |
| <i>Lucilia sericata</i> strain DI246 ACT, Australia | Calliphoridae | JX913754  | 15243 | Canberra, ACT, Australia (Voucher-DI246)                                                                             | (Nelson et al., 2012)        |
| <i>Lucilia sericata</i> strain DI257 Utah, USA      | Calliphoridae | JX913757  | 15380 | Brigham Young University campus, Provo, UT, USA (Voucher-DI257)                                                      | (Nelson et al., 2012)        |

|                                        |               |           |       |                                                |                        |
|----------------------------------------|---------------|-----------|-------|------------------------------------------------|------------------------|
| <i>Lucilia sericata</i> TAS, Australia | Calliphoridae | MW255540  | 15946 | TAS, Australia                                 | (Kapoor et al., 2023)  |
| <i>Lucilia sericata</i> UK             | Calliphoridae | AJ422212  | 15945 | UK                                             | (Stevens et al., 2008) |
| <i>Lucilia shenyangensis</i>           | Calliphoridae | NC_059913 | 14989 | China                                          | (Chen) (unpublished)   |
| <i>Rutelia goerlingiana</i>            | Tachinidae    | NC_019640 | 15331 | Mary River Roadhouse, Burrundie, NT, Australia | (Nelson et al., 2012)  |
| <i>Sarcophaga brevicornis</i>          | Sacrophagidae | NC_047404 | 15152 | China                                          | (Zhang et al., 2019)   |
| <i>Sarcophaga impatiens</i>            | Sacrophagidae | NC_017605 | 15169 | University of Wollongong, NSW, Australia       | (Nelson et al., 2012)  |
| <i>Sarcophaga kanoi</i>                | Sacrophagidae | NC_051537 | 15319 | China                                          | (She et al., 2019)     |
| <i>Sarcophaga tuberosa</i>             | Sacrophagidae | MK820723  | 15173 | China                                          | (Kai et al., 2019)     |
