# Supplementary material for: Complete Mitochondrial Genome for Lucilia cuprina dorsalis (Diptera: Calliphoridae) from the Northern Territory, Australia
Source: MDPI journal article supplement (doi:10.3390/genes15040506), 2024-04-18
Supplement: s1 [file s1]

**Table S3**

Nucleotide polymorphisms in the mitochondrial (mt) genome of *Lucilia cuprina dorsalis* collected from the Northern Territory in Australia.

| Position | Polymorphism       | Reference | Variant | Gene        |
|----------|--------------------|-----------|---------|-------------|
| 485      | SNP (transition)   | A         | G       | <i>nad2</i> |
| 695      | SNP (transition)   | A         | G       | <i>nad2</i> |
| 752      | SNP (transition)   | A         | G       | <i>nad2</i> |
| 984      | SNP (transversion) | A         | T       | <i>nad2</i> |
| 1079     | SNP (transition)   | G         | A       | <i>nad2</i> |
| 1190     | SNP (transition)   | T         | C       | <i>nad2</i> |
| 1211     | SNP (transition)   | C         | T       | <i>nad2</i> |
| 1524     | SNP (transition)   | C         | T       | <i>nad2</i> |
| 1692     | SNP (transversion) | T         | A       | <i>nad2</i> |
| 1713     | SNP (transition)   | C         | T       | <i>cox2</i> |
| 1878     | SNP (transition)   | C         | T       | <i>cox2</i> |
| 1908     | SNP (transition)   | T         | C       | <i>cox2</i> |
| 2127     | SNP (transition)   | C         | T       | <i>cox2</i> |
| 2145     | SNP (transition)   | C         | T       | <i>cox2</i> |
| 2157     | SNP (transition)   | T         | C       | <i>cox2</i> |
| 2184     | SNP (transition)   | T         | C       | <i>cox2</i> |
| 7960     | SNP (transition)   | C         | T       | <i>nad5</i> |
| 9192     | SNP (transversion) | T         | A       | <i>nad4</i> |
| 9216     | SNP (transition)   | T         | C       | <i>nad4</i> |
| 10680    | SNP (transition)   | C         | T       | <i>cob</i>  |
| 11124    | SNP (transversion) | C         | A       | <i>cob</i>  |
| 11699    | SNP (transition)   | T         | C       | <i>nad1</i> |
| 11765    | SNP (transition)   | C         | T       | <i>nad1</i> |
| 11798    | SNP (transition)   | C         | T       | <i>nad1</i> |
| 11852    | SNP (transversion) | A         | T       | <i>nad1</i> |
| 11972    | SNP (transition)   | T         | C       | <i>nad1</i> |
| 15938    | SNP (transversion) | T         | A       |             |
| 15939    | SNP (transversion) | T         | A       |             |
